# Supplementary material
Source: Springer Nature journal article supplement (https://www.springermedizin.de/resource/supplementary/12914_2011_169_MOESM1_ESM.PDF/9536918)
Supplement: MOESM1 [file 9536918]

|                                                                                                                            | Process to Access Primary Healthcare Services                                                                                                                                                                                                                                                                                                                                                                                                                                                          | Population Affected                                                                                                                                                                                                                                                                                                                                                                                                                                                                                                                                                                                                                                                                                                                                                                                                                                                                                                                                                                                                   |
|----------------------------------------------------------------------------------------------------------------------------|--------------------------------------------------------------------------------------------------------------------------------------------------------------------------------------------------------------------------------------------------------------------------------------------------------------------------------------------------------------------------------------------------------------------------------------------------------------------------------------------------------|-----------------------------------------------------------------------------------------------------------------------------------------------------------------------------------------------------------------------------------------------------------------------------------------------------------------------------------------------------------------------------------------------------------------------------------------------------------------------------------------------------------------------------------------------------------------------------------------------------------------------------------------------------------------------------------------------------------------------------------------------------------------------------------------------------------------------------------------------------------------------------------------------------------------------------------------------------------------------------------------------------------------------|
| 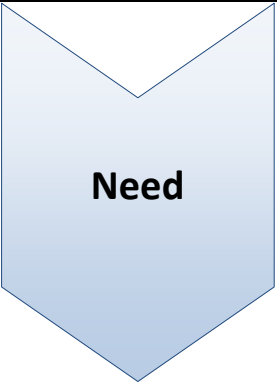 <p><b>Need</b></p>                       | <p>The number of children less than 5 years who presented with an ARI in the previous 2 weeks</p>                                                                                                                                                                                                                                                                                                                                                                                                      | <p><b>Total Population:</b> The occurrence of acute respiratory infection is quite high across the general population, Roma and poorest quintile.</p> <p><b>The Roma:</b> Roma children are much more likely to present with symptoms of acute respiratory infection than either the general population or poorest quintile.</p>                                                                                                                                                                                                                                                                                                                                                                                                                                                                                                                                                                                                                                                                                      |
|  <p><b>Personal Documents</b></p>         | <p>In order to obtain a health insurance card, one needs to register with the authorities and obtain an ID card (Lične Karta).</p> <p>The following documentation is required;</p> <ul style="list-style-type: none"> <li>- Proof of residence (a permanent Serbian address)</li> </ul> <p>AND one of the following;</p> <ul style="list-style-type: none"> <li>- Birth certificate</li> <li>- IDP card</li> <li>- Work booklet</li> <li>- Marriage certificate</li> <li>- Citizenship card</li> </ul> | <p><b>Total Population:</b> Access to personal documents is adequate across the general population and poorest quintile.</p> <p><b>The Roma:</b> The Roma are less likely to have personal documents.</p> <p><b>Subgroups of Roma:</b> Within the Roma population, rural dwellers are worse off.</p>                                                                                                                                                                                                                                                                                                                                                                                                                                                                                                                                                                                                                                                                                                                  |
|  <p><b>Availability</b></p>             | <p>It is assumed that a family doctor will have access to the knowledge, diagnostic tests, and equipment that are required to diagnose and treat ARI.</p> <p>Therefore the proxy for availability is whether a child has a family doctor.</p>                                                                                                                                                                                                                                                          | <p><b>Total Population:</b> The proportion of population with a family physician is low for the general population, poorest quintile and Roma.</p> <p><b>The Roma:</b> The Roma are not disproportionately affected.</p> <p><b>Subgroups of Roma:</b> Within the Roma population, the following groups are less likely to have a family physician:</p> <ul style="list-style-type: none"> <li>- males,</li> <li>- urban dwellers,</li> <li>- those with incomplete high school, and</li> <li>- the employed.</li> </ul>                                                                                                                                                                                                                                                                                                                                                                                                                                                                                               |
|  <p><b>Geographic Accessibility</b></p> | <p>In order for an ARI to be treated by a physician, the child must present to either a general practitioner or a primary care centre (dom zdravlja).</p> <p>They can travel via public transport, private transport, or on foot.</p>                                                                                                                                                                                                                                                                  | <p><b>Total Population:</b> Coverage is excellent with a large majority of the general population, poorest quintile, and Roma living within 5km of a primary care centre or family physician</p> <p><b>The Roma:</b> The Roma are still disproportionately affected with more Roma living further than 5km from a primary care centre, family physician or polyclinic.</p> <p><b>Subgroups of Roma:</b> Within the Roma population, the following groups are less likely to be further than 5km from a primary care centre (dom zdravlja):</p> <ul style="list-style-type: none"> <li>- the rural population</li> <li>- the unemployed</li> </ul>                                                                                                                                                                                                                                                                                                                                                                     |
|  <p><b>Affordability</b></p>            | <p><b>Affordability of Medical Services:</b></p> <ul style="list-style-type: none"> <li>- The parents of children must pay a small user fee</li> </ul> <p><b>Affordability of Medications:</b></p> <ul style="list-style-type: none"> <li>- Parents must be able to afford to purchase the antibiotics for their ill children</li> </ul>                                                                                                                                                               | <p><b><u>Affordability of Medical Services:</u></b></p> <p><b>Total Population:</b> most of the general population, poorest quintile, and Roma are able to afford health services.</p> <p><b>The Roma:</b> The Roma are disproportionally affected with more Roma not being able to afford health services</p> <p><b>Subgroups of Roma:</b> Within the Roma population, all Roma are affected equally.</p> <p><b><u>Affordability of Medications:</u></b></p> <p><b>Total Population:</b> The number of persons that can afford to purchase medications is very low among the general population, poorest quintile and Roma.</p> <p><b>The Roma:</b> The Roma and poorest quintile are disproportionately affected by the cost of medications.</p> <p><b>Subgroups of Roma:</b> Within the Roma population, the following groups are less likely to be able to purchase medications:</p> <ul style="list-style-type: none"> <li>- those who have not completed high school, and</li> <li>- the unemployed.</li> </ul> |

|                                                                                                         |                                                                                                                                                                                                                                                                                                                                                                                                                         |                                                                                                                                                                                                                                                                                                                                                                                                                                                                                                                                                                                                                                                                                                                                                                                                                                                 |
|---------------------------------------------------------------------------------------------------------|-------------------------------------------------------------------------------------------------------------------------------------------------------------------------------------------------------------------------------------------------------------------------------------------------------------------------------------------------------------------------------------------------------------------------|-------------------------------------------------------------------------------------------------------------------------------------------------------------------------------------------------------------------------------------------------------------------------------------------------------------------------------------------------------------------------------------------------------------------------------------------------------------------------------------------------------------------------------------------------------------------------------------------------------------------------------------------------------------------------------------------------------------------------------------------------------------------------------------------------------------------------------------------------|
|  <p>Acceptability</p>  | <p><b><u>Acceptability to Provider:</u></b></p> <ul style="list-style-type: none"><li>- Providers should not discriminate against Roma children.</li></ul> <p><b><u>Acceptability to Patient</u></b></p> <ul style="list-style-type: none"><li>- Parents must recognize that ARI is a serious infection that they should seek treatment for.</li><li>- Parents must find the treatment culturally acceptable.</li></ul> | <p><b><u>Acceptability to Provider:</u></b></p> <p><b>Total Population:</b> No quantitative data currently exists on the extent of discrimination within the health system</p> <p><b>The Roma:</b> From case studies, the Roma appear to be disproportionately discriminated against.</p> <p><b>Subgroups of Roma:</b> Within the Roma population, there is no data on whether certain subgroups are more discriminated against.</p> <p><b><u>Acceptability to Patient</u></b></p> <p>There is no statistical difference between the three population groups with regards to whether parents sought any form of treatment including herbal teas, holding a religious ceremony, and consulting a family member or friend.</p> <p>There is no data on any population group regarding the acceptability of antibiotics as a treatment for ARI.</p> |
|  <p>Effectiveness</p> | <ul style="list-style-type: none"><li>- <b><u>Diagnostic Accuracy:</u></b> Providers must correctly diagnose a child with ARI and only prescribe antibiotics for bacterial infections</li><li>- <b><u>Efficacy:</u></b> The antibiotics should show high rates of efficacy in treatment of ARI</li><li>- <b><u>Adherence:</u></b> Children should adhere to the full course of antibiotics prescribed</li></ul>         | <p><b>The Roma:</b> There are limited studies however it appears that efficacy is the same across all three population groups, however diagnostic accuracy is lower in the Roma population.</p>                                                                                                                                                                                                                                                                                                                                                                                                                                                                                                                                                                                                                                                 |

EFFECTIVE COVERAGE
